# Supplementary material for: TMEM41B and VMP1 modulate cellular lipid and energy metabolism for facilitating dengue virus infection
Source: PLoS Pathog. 2022 Aug 8;18(8):e1010763. doi: 10.1371/journal.ppat.1010763 (PMC9387935; doi:10.1371/journal.ppat.1010763)
Supplement: S2 Table — (XLSX) [file ppat.1010763.s007.xlsx]

## Sheet: Legends
S2 Table. Data table for metabolomics results, identifying metabolites with significant alteration in TMEM41B KO and VMP1 KO cells
	Column	Description
	A	Metabolite name
	B	293FT WT replicate 1 (absolute values)
	C	293FT WT replicate 2 (absolute values)
	D	293FT WT replicate 3 (absolute values)
	E	TMEM41B KO #1 replicate 1 (absolute values)
	F	TMEM41B KO #1 replicate 2 (absolute values)
	G	TMEM41B KO #1 replicate 3 (absolute values)
	H	VMP1 KO #1 replicate 1 (absolute values)
	I	VMP1 KO #1 replicate 2 (absolute values)
	J	VMP1 KO #1 replicate 3 (absolute values)
	K	293FT WT replicate 1 (z-score normalized)
	L	293FT WT replicate 2 (z-score normalized)
	M	293FT WT replicate 3 (z-score normalized)
	N	TMEM41B KO #1 replicate 1 (z-score normalized)
	O	TMEM41B KO #1 replicate 2 (z-score normalized)
	P	TMEM41B KO #1 replicate 3 (z-score normalized)
	Q	VMP1 KO #1 replicate 1 (z-score normalized)
	R	VMP1 KO #1 replicate 2 (z-score normalized)
	S	VMP1 KO #1 replicate 3 (z-score normalized)
	T	Ratio of metabolite level in VMP1 KO vs WT (in average of three replicates)
	U	Ratio of metabolite level in TMEM41B KO vs WT (in average of three replicates)
	V	Average fold change of metabolite level in TMEM41B KO vs WT
	W	Average fold change of metabolite level in VMP1 KO vs WT
	X	p-vlaue of metabolite level change in TMEM41B KO vs WT
	Y	p-vlaue of metabolite level change in VMP1 KO vs WT
	Z	Adjusted p-vlaue of metabolite level change in TMEM41B KO vs WT
	AA	Adjusted p-vlaue of metabolite level change in VMP1 KO vs WT

## Sheet: (A) Hydrophobic metabolites
Used to generate the heatmap on Fig 4
	Absolute values									z-score normalized values									Ratio of metabolite level changes		Metabolite fold change compared to WT		Metabolite level change statistical significance		Metabolite level change statistical significance (adjusted for multiple comparisons)
Lipid_metabolite	WT_1	WT_2	WT_3	TMEM41BKO_1	TMEM41BKO_2	TMEM41BKO_3	VMP1KO_1	VMP1KO_2	VMP1KO_3	WT_1	WT_2	WT_3	TMEM41BKO_1	TMEM41BKO_2	TMEM41BKO_3	VMP1KO_1	VMP1KO_2	VMP1KO_3	Ratio_TMEM41BKO_vs_WT	Ratio_VMP1KO_vs_WT	FC_TMEM41BKO_vs_WT	FC_VMP1KO_vs_WT	p_val_TMEM41B_vs_WT	p_val_VMP1_vs_WT	adj_p_val_TMEM41B_vs_WT	adj_p_val_VMP1_vs_WT
FA (14:1)	128364	136527	111885	153968	128588	132475	65224.4	59001.2	68605.3	0.564735	0.807857	0.0739028	1.32737	0.571406	0.68718	-1.31593	-1.50129	-1.21523	1.10153	0.511791	1.10153	-1.95392	0.300256	0.00706223	0.373241	0.0712931
FA (16:0)	3.03733e+06	3.10889e+06	2.45044e+06	3.29704e+06	2.6709e+06	2.77815e+06	1.80854e+06	1.9445e+06	1.98436e+06	0.912119	1.05014	-0.219936	1.41306	0.205303	0.412179	-1.45808	-1.19584	-1.11895	1.01738	0.6674	1.01738	-1.49835	0.86953	0.037765	0.759546	0.0986656
FA (16:1)	522808	509089	469413	511895	425914	436678	105942	81810.6	115479	0.936185	0.860444	0.641415	0.875938	0.401281	0.460699	-1.36513	-1.49835	-1.31248	0.915525	0.201977	-1.09227	-4.95105	0.264804	0.00010853	0.352966	0.00757781
FA (18:0)	2.3453e+06	1.98423e+06	1.6652e+06	2.54266e+06	2.35993e+06	2.46756e+06	1.67456e+06	1.9632e+06	1.83466e+06	0.784386	-0.33831	-1.33028	1.39804	0.829868	1.16451	-1.30116	-0.403697	-0.803353	1.22944	0.912873	1.22944	-1.09544	0.136803	0.480454	0.221073	0.528076
FA (18:1)	5.67606e+06	5.00404e+06	4.16821e+06	6.35881e+06	4.49969e+06	4.68465e+06	1.27888e+06	936022	1.39673e+06	0.987369	0.637763	0.202936	1.34256	0.375383	0.471602	-1.30018	-1.47855	-1.23887	1.0468	0.243236	1.0468	-4.11124	0.769648	0.00831275	0.70027	0.0712931
FA (20:1)	466954	362200	310395	567793	452905	469629	192108	168358	196843	0.823431	0.0588871	-0.319212	1.55941	0.720895	0.842956	-1.18253	-1.35587	-1.14797	1.30782	0.489061	1.30782	-2.04473	0.119842	0.0475197	0.198631	0.0986656
FA (20:3)	133806	185310	79180.1	200635	178190	172218	43724.5	28477.4	42372.4	0.237102	1.02022	-0.593489	1.25324	0.911949	0.821152	-1.13259	-1.36442	-1.15315	1.3835	0.287661	1.3835	-3.47632	0.233867	0.0873926	0.325362	0.128073
FA (20:4)	96495.2	75925.4	61559.5	71987.3	80146.7	72481.8	51678.1	30168.3	35374.1	1.60011	0.58786	-0.119096	0.394065	0.795592	0.4184	-0.605365	-1.66388	-1.40769	0.959978	0.500985	-1.04169	-1.99607	0.790837	0.0401993	0.70027	0.0986656
FA (20:5)	49524.8	30720.6	35095.6	61133.5	60123.5	62848.8	38318.5	35010.3	41191.2	0.295867	-1.28087	-0.914031	1.26926	1.18457	1.41308	-0.643787	-0.921177	-0.402912	1.59619	0.992882	1.59619	-1.00717	0.0537551	0.966902	0.100787	0.950872
FA (22:1)	201884	146028	135169	276959	248283	257193	120310	113020	117581	0.354222	-0.533768	-0.706412	1.54775	1.09187	1.23352	-0.942632	-1.05853	-0.986026	1.61968	0.726402	1.61968	-1.37665	0.0269505	0.165404	0.0622171	0.213143
FA (22:5)	29471.9	47342.3	18113.1	39892.3	33985	33077.1	25773.7	16829.5	26706.4	-0.0715179	1.86357	-1.3015	1.05685	0.417183	0.318871	-0.47198	-1.4405	-0.370977	1.1267	0.730133	1.1267	-1.36961	0.687996	0.427225	0.654001	0.4838
FA (22:6)	79808.3	131133	53065.3	105836	91175.1	91846.3	95629.3	69913.4	88101.8	-0.473823	2.00674	-1.76634	0.784117	0.0755465	0.107985	0.290822	-0.952057	-0.0729887	1.09413	0.960752	1.09413	-1.04085	0.754745	0.897218	0.70027	0.894107
TG (37:4)	2018428	1725754	1591295	1944785	2042334	2018037	609127	584161	1126128	0.888464	0.369073	0.130457	0.757774	0.930888	0.88777	-1.61254	-1.65684	-0.695047	1.12551	0.434716	1.12551	-2.30035	0.214462	0.0124005	0.312501	0.0712931
TG (44:3)	1299820	947234	873435	1165204	1192502	1126406	459295	503521	449143	1.27685	0.176363	-0.0539773	0.856686	0.941888	0.73559	-1.34658	-1.20854	-1.37827	1.11653	0.45248	1.11653	-2.21004	0.4548	0.0474249	0.474166	0.0986656
TG (46:4)	6611976	4492048	3935873	5842058	5659798	5541452	1681259	1644143	1635208	1.3239	0.19947	-0.0955299	0.915525	0.818853	0.756082	-1.29139	-1.31108	-1.31582	1.13321	0.32983	1.13321	-3.03186	0.499289	0.0541084	0.512286	0.103694
TG (48:4)	9931542	6604907	5860003	9196199	8938293	8811045	2027574	2085370	2110781	1.19793	0.137385	-0.100093	0.963496	0.881275	0.840708	-1.32188	-1.30346	-1.29536	1.20312	0.277889	1.20312	-3.59856	0.349258	0.0498542	0.418075	0.100705
TG (48:4)	14412306	10127467	9176379	13593579	12942170	12637554	3687433	3565926	3743886	1.18941	0.188454	-0.0337245	0.998155	0.845982	0.774823	-1.31597	-1.34435	-1.30278	1.16186	0.326171	1.16186	-3.06587	0.375926	0.0422349	0.418484	0.0986656
TG (50:4)	12591157	10380964	9513164	11604222	11029575	10812660	4137363	4172505	4474266	1.17662	0.500263	0.234701	0.874601	0.698749	0.632369	-1.41038	-1.39963	-1.30729	1.02959	0.393536	1.02959	-2.54106	0.763771	0.0178256	0.70027	0.0856622
TG (50:5)	23980822	16472752	14676609	23688262	22397246	21780486	5180417	4833606	5198070	1.09942	0.142301	-0.086668	1.06212	0.897545	0.818921	-1.29723	-1.34144	-1.29497	1.23101	0.27593	1.23101	-3.6241	0.272767	0.0427179	0.352966	0.0986656
TG (51:4)	3392211	2128612	1873765	3874969	3371751	3287765	998583	988047	933145	0.960423	-0.167792	-0.395334	1.39146	0.942155	0.867168	-1.17675	-1.18615	-1.23517	1.42462	0.394853	1.42462	-2.53259	0.143434	0.0861425	0.226137	0.128073
TG (52:0)	2302147	1399751	1197691	2874512	2354043	2214329	200543	201392	221700	0.868681	-0.0412703	-0.245022	1.44584	0.921011	0.780128	-1.25052	-1.24966	-1.22918	1.51908	0.127283	1.51908	-7.8565	0.113938	0.0522741	0.193814	0.102815
TG (52:1)	2466093	1598688	1430301	3538665	3023405	2888373	302801	315820	343076	0.583933	-0.141073	-0.281816	1.48042	1.04975	0.936888	-1.22422	-1.21334	-1.19055	1.7198	0.17501	1.7198	-5.71394	0.0335474	0.0420903	0.0747759	0.0986656
TG (52:4)	8459066	5619596	4869705	6883928	6123908	6124999	2027713	2087024	2153687	1.60041	0.313553	-0.0262999	0.886552	0.542109	0.542603	-1.3143	-1.28742	-1.25721	1.00974	0.330816	1.00974	-3.02283	0.960847	0.0606929	0.828122	0.110639
TG (52:5)	23557244	18976392	17355492	22996296	22103576	21303880	8339347	8362956	8824344	1.08208	0.340971	0.0787336	0.991331	0.846903	0.717524	-1.37994	-1.37612	-1.30148	1.10878	0.426232	1.10878	-2.34614	0.363144	0.0245997	0.418484	0.0970544
TG (52:6)	15419530	10317765	9206538	15686257	14790067	14574705	3165638	3135325	3288843	1.04722	0.0697258	-0.143185	1.09833	0.926619	0.885356	-1.30062	-1.30643	-1.27702	1.28924	0.274435	1.28924	-3.64385	0.217552	0.0475242	0.312501	0.0986656
TG (53:6)	1587469	961672	828126	1730072	1527092	1561634	374941	364981	412618	1.01551	-0.142613	-0.389758	1.27941	0.903772	0.967697	-1.22844	-1.24687	-1.15871	1.42683	0.341264	1.42683	-2.93028	0.169659	0.0862745	0.261114	0.128073
TG (54:4)	1810269	1077175	1028244	1260576	939512	877876	532470	476464	487534	2.14059	0.330446	0.209627	0.783296	-0.0094685	-0.161659	-1.01453	-1.15282	-1.12548	0.78606	0.382172	-1.27217	-2.61662	0.394918	0.0852154	0.418484	0.128073
TG (54:5)	10204941	6780268	6030042	10014336	8775150	8463580	3236144	3069386	3220004	1.29175	0.0495152	-0.222615	1.22261	0.77312	0.660104	-1.23605	-1.29654	-1.2419	1.18413	0.413879	1.18413	-2.41616	0.390566	0.0726065	0.418484	0.120591
TG (54:7)	4229124	3067203	2979527	4195848	3792102	3693206	1978658	1803303	1845850	1.24865	0.00238426	-0.0916565	1.21296	0.779906	0.673831	-1.16518	-1.35327	-1.30763	1.13676	0.547673	1.13676	-1.82591	0.368448	0.0591127	0.418484	0.110452
TG (56:5)	2105963	1283555	1117829	1514953	1290681	1213761	446060	392106	435458	1.87899	0.359574	0.0533923	0.787087	0.37274	0.230628	-1.18771	-1.2874	-1.2073	0.891743	0.282566	-1.1214	-3.53899	0.653722	0.0713784	0.630695	0.120591
TG (O-44:5)	2956302	1870088	1695523	4191825	3584021	3472131	369251	338096	366281	0.60138	-0.155917	-0.277622	1.46277	1.03902	0.961011	-1.20228	-1.22401	-1.20436	1.72464	0.164619	1.72464	-6.07465	0.0369731	0.0439886	0.0796647	0.0986656
TG (O-46:3)	2681568	2113868	1921634	2466888	2415622	2579092	1081960	1107580	1142663	1.17054	0.26756	-0.0382039	0.829069	0.747526	1.00754	-1.37378	-1.33303	-1.27722	1.11084	0.49608	1.11084	-2.0158	0.390773	0.0378353	0.418484	0.0986656
TG (O-46:5)	2049441	1537686	1320467	1796774	1912554	1649628	562566	625765	641741	1.26984	0.348556	-0.0424894	0.814976	1.02341	0.550078	-1.40689	-1.29312	-1.26436	1.09197	0.372906	1.09197	-2.68164	0.566923	0.0401338	0.563783	0.0986656
TG (O-48:1)	20856216	14139730	12606727	20585736	18809462	17041088	1863148	1795206	2023845	1.1239	0.25273	0.0538911	1.08881	0.858421	0.629053	-1.33961	-1.34843	-1.31877	1.18557	0.119367	1.18557	-8.37751	0.36979	0.0312527	0.418484	0.0986656
TG (O-48:3)	3018686	2404463	2186816	2238598	2161550	2113532	265695	247692	274849	1.33772	0.734363	0.520566	0.571432	0.495747	0.448578	-1.36657	-1.38426	-1.35758	0.855941	0.103579	-1.16831	-9.65442	0.278865	0.0117218	0.353447	0.0712931
TG (O-48:4)	5460471	3652669	3308042	5736533	5306034	5155573	351708	325067	362779	0.975131	0.1609	0.00568013	1.09947	0.905573	0.837805	-1.32585	-1.33785	-1.32086	1.30407	0.083692	1.30407	-11.9486	0.194223	0.0295582	0.291967	0.0986656
TG (O-50:2)	17830036	11501349	10361067	22886282	22074236	20028866	2095306	2040071	2243088	0.6653	-0.101635	-0.239819	1.27804	1.17963	0.931763	-1.2415	-1.24819	-1.22359	1.63732	0.160697	1.63732	-6.22288	0.0545719	0.0410018	0.100787	0.0986656
TG (O-50:3)	1813631	1375840	1232032	1479276	1385953	1387762	203718	194062	222513	1.29656	0.569656	0.330879	0.7414	0.586448	0.589451	-1.37652	-1.39256	-1.34532	0.961888	0.14029	-1.03962	-7.12809	0.780179	0.0183382	0.70027	0.0856622
TG (O-50:5)	6070416	3939028	3630837	8324801	7717439	7455532	510648	469935	535570	0.578603	-0.115976	-0.216409	1.31326	1.11534	1.02999	-1.23322	-1.24649	-1.2251	1.72268	0.111153	1.72268	-8.99664	0.0392447	0.0341131	0.0818315	0.0986656
TG (O-52:4)	6195021	4031236	3578287	6651309	5617574	5529851	684258	646244	718081	1.04844	0.124716	-0.0686498	1.24324	0.80193	0.76448	-1.30412	-1.32035	-1.28968	1.28934	0.148399	1.28934	-6.73858	0.236572	0.0398487	0.325362	0.0986656
3-O-Sulfogalactosylceramide (d34:1)	2414314	1898723	1764152	2438823	2544008	2733495	593328	416078	525724	0.79884	0.219658	0.068489	0.826372	0.94453	1.15739	-1.24674	-1.44585	-1.32268	1.26972	0.252605	1.26972	-3.95875	0.0937825	0.0124004	0.163841	0.0712931
Ganglioside GM3 (d34:1)	2567913	2999388	2688762	4041275	4673346	5017131	8106236	5825162	7189998	-1.19698	-0.964546	-1.13188	-0.403287	-0.0627937	0.122402	1.78649	0.557684	1.29291	1.66323	2.55829	1.66323	2.55829	0.0124399	0.0199167	0.0382912	0.0875632
Galactosylceramide (d34:1)	2944058	2904861	3273592	4486041	3891290	3852853	11411596	13298237	10515198	-0.847747	-0.857689	-0.764165	-0.456642	-0.607493	-0.617242	1.29994	1.77846	1.07258	1.34066	3.86133	1.34066	3.86133	0.0194211	0.00779049	0.0487873	0.0712931
Galactosylceramide (d42:2)	18309444	15212199	15258889	15321887	14423219	16952436	40046592	36284280	36596944	-0.468462	-0.767825	-0.763312	-0.757224	-0.844084	-0.599623	1.63253	1.26889	1.29911	0.957299	2.31502	-1.04461	2.31502	0.614762	0.000202778	0.602094	0.00757781
LacCer (d34:1)	860742	475966	495451	835927	763352	792429	2117041	2154197	2330559	-0.475714	-1.01076	-0.983663	-0.51022	-0.611138	-0.570706	1.27121	1.32288	1.56811	1.3054	3.60329	1.3054	3.60329	0.273024	0.00144327	0.352966	0.0269675
LacCer (d42:1)	1843172	763192	781860	890481	759267	882939	4456607	3256208	4238105	-0.0964329	-0.826833	-0.814208	-0.740746	-0.829488	-0.745847	1.67106	0.859216	1.52328	0.747497	3.52719	-1.3378	3.52719	0.508734	0.00514514	0.513822	0.0712931
LacCer (d42:2)	1967396	939880	971186	1303753	1267144	1293821	8307892	6906357	8660193	-0.485241	-0.807814	-0.797986	-0.693581	-0.705074	-0.696699	1.50526	1.06527	1.61586	0.996456	6.15565	-1.00356	6.15565	0.990402	0.00107483	0.842363	0.0267775
PC (O-30:0)	6377240	4426758	3846097	11386046	12022292	12141628	7520165	5832273	7853520	-0.514603	-1.15935	-1.3513	1.14111	1.35142	1.39087	-0.136798	-0.694747	-0.0266041	2.4266	1.4475	2.4266	1.4475	0.00747477	0.0942699	0.0241585	0.135495
PC (O-30:1)	2666622	1692833	1613120	5868016	5595835	5507138	3502653	2512669	3510774	-0.596279	-1.21326	-1.26376	1.43208	1.25963	1.20343	-0.0665816	-0.693821	-0.0614363	2.84149	1.59497	2.84149	1.59497	0.00477111	0.0667968	0.0181414	0.116102
PC (O-34:1)	8031713	5194848	5062598	12054482	10894036	11560936	4826272	4661318	7518490	0.0955414	-0.887778	-0.933618	1.48992	1.08768	1.31885	-1.01553	-1.07271	-0.0823528	1.88688	0.929845	1.88688	-1.07545	0.0211943	0.765594	0.0507407	0.783842
PC (O-36:2)	25830334	18007424	16172139	78166104	80622064	79809600	50199588	43301856	59882908	-0.985428	-1.30148	-1.37563	1.12901	1.22823	1.1954	-0.0008786	-0.279556	0.39034	3.97597	2.55598	3.97597	2.55598	0.0015184	0.00891709	0.00841763	0.0712931
PC (O-36:3)	10536557	7121003	6620315	17715880	17818932	17292192	13109308	9590028	13163983	-0.485538	-1.30837	-1.42899	1.24401	1.26883	1.14194	0.134254	-0.713563	0.147425	2.17593	1.4772	2.17593	1.4772	0.0150649	0.0864924	0.0405747	0.128073
PC (P-32:0)	41826272	31252664	29663716	132658968	138674144	134126208	67944320	49936208	69320464	-0.825008	-1.07115	-1.10813	1.28944	1.42947	1.3236	-0.217018	-0.63622	-0.184983	3.94636	1.82204	3.94636	1.82204	0.000223057	0.0259815	0.00240307	0.0970929
PC (P-32:1)	10179696	7120379	6610853	26059168	24202932	26076012	12035138	8397805	11951266	-0.584877	-0.977502	-1.04289	1.45306	1.21483	1.45522	-0.346754	-0.81356	-0.357518	3.1926	1.35437	3.1926	1.35437	0.000669432	0.159871	0.00480801	0.209627
PC (P-34:0)	114782616	82056408	77635336	203330336	216218944	209984112	137793504	111669200	145735552	-0.581602	-1.2252	-1.31215	1.1598	1.41327	1.29065	-0.129064	-0.642831	0.0271262	2.2936	1.43984	2.2936	1.43984	0.00566832	0.0622855	0.0192842	0.110839
PC (P-34:2)	4355432	3168518	2825475	9029108	9107594	8694253	5103301	4171132	5166626	-0.579234	-1.07732	-1.22128	1.38207	1.415	1.24155	-0.265392	-0.656575	-0.238818	2.59251	1.39535	2.59251	1.39535	0.00449354	0.0808205	0.0181414	0.128073
PC (P-36:0)	15267595	10481879	9811790	32630508	35276920	32651322	11878361	15795729	20756240	-0.538458	-1.03042	-1.09931	1.24642	1.51847	1.24856	-0.886865	-0.484166	0.025766	2.82776	1.36188	2.82776	1.36188	0.00156268	0.247086	0.00841763	0.302742
PC (P-38:0)	1877078	1376776	1191273	2869701	2999049	2792126	966369	1142013	1682093	-0.0004054	-0.657977	-0.901793	1.30425	1.47426	1.20229	-1.1974	-0.966538	-0.256684	1.9484	0.852726	1.9484	-1.17271	0.0146624	0.503607	0.0405747	0.545502
PC (P-38:1)	1619113	1247754	1216252	5282096	5471034	5521819	1558305	1966890	2602926	-0.736116	-0.942616	-0.960133	1.30074	1.4058	1.43404	-0.76993	-0.54273	-0.189053	3.98591	1.50084	3.98591	1.50084	7.4e-05	0.141022	0.00119561	0.191636
PC (P-38:3)	1112178	784397	726494	2644682	2672083	2877863	721534	1100809	1729563	-0.566679	-0.950101	-1.01783	1.22597	1.25802	1.49873	-1.02364	-0.579978	0.155507	3.12406	1.3541	3.12406	1.3541	0.000558101	0.409941	0.00478976	0.475169
PG (32:1)	602582	444135	389125	4962286	5020775	5333869	1756591	1181275	1558722	-0.88249	-0.962007	-0.989614	1.30545	1.3348	1.49193	-0.303345	-0.59207	-0.402647	10.6676	3.13167	10.6676	3.13167	3.67e-05	0.0165218	0.00118645	0.0856622
PG (34:1)	16691523	13322411	12824751	30367890	30444828	29958486	14822951	11474198	14222736	-0.339226	-0.769493	-0.833049	1.40738	1.4172	1.35509	-0.57786	-1.00553	-0.654513	2.11891	0.945871	2.11891	-1.05723	0.0051672	0.653546	0.018556	0.687972
PG (34:2)	2340707	1631203	1471165	18271182	18260484	18656504	5392938	3785740	4777381	-0.81965	-0.917442	-0.9395	1.37606	1.37459	1.42917	-0.398958	-0.620479	-0.483801	10.1392	2.564	10.1392	2.564	1.74e-05	0.0115384	0.00112174	0.0712931
PG (36:2)	54915228	43339116	41146080	101124584	102035784	98837864	52579592	41233408	49562432	-0.392267	-0.843666	-0.929182	1.40962	1.44515	1.32045	-0.483343	-0.925776	-0.600994	2.16641	1.02852	2.16641	1.02852	0.00448262	0.820611	0.0181414	0.828817
PG (36:3)	3113543	2136825	1908511	14722983	15012114	15226695	3993796	2784374	3664981	-0.671389	-0.842248	-0.882188	1.35948	1.41006	1.44759	-0.517404	-0.728971	-0.574924	6.28056	1.45877	6.28056	1.45877	0.000189811	0.101494	0.00240307	0.143126
PG (38:4)	566594	529880	311041	2277676	2344163	2274016	631957	294735	618230	-0.614108	-0.656836	-0.911528	1.3773	1.45468	1.37304	-0.538036	-0.930505	-0.554012	4.89931	1.09762	4.89931	1.09762	0.000942805	0.75483	0.00609429	0.783555
LPE (18:1)	1064411	876864	657873	2211214	1667726	1685604	709316	455130	652222	-0.0782253	-0.407777	-0.79258	1.9369	0.9819	1.01331	-0.702186	-1.14883	-0.80251	2.14091	0.698948	2.14091	-1.43072	0.0137552	0.148177	0.0404153	0.197764
PE (38:3)	17057852	13782387	12462780	31085520	29864266	29537150	14051453	9158132	14195384	-0.241873	-0.645298	-0.807828	1.48585	1.33544	1.29515	-0.612159	-1.21485	-0.594431	2.08962	0.863796	2.08962	-1.15768	0.00378962	0.413246	0.0174972	0.475169
PE (38:3)	8333090	6001124	5703879	12928184	8956084	13116623	3560490	1720956	3395489	0.325511	-0.280037	-0.357224	1.51873	0.487286	1.56767	-0.913804	-1.39148	-0.95665	1.74672	0.433022	1.74672	-2.30935	0.0452587	0.0246726	0.0886522	0.0970544
PE (40:3)	1531192	1609719	1464064	6027832	5239569	5846851	2102944	1290276	2510465	-0.807353	-0.766132	-0.842591	1.55307	1.13929	1.45807	-0.507223	-0.933817	-0.293303	3.71647	1.28202	3.71647	1.28202	0.00255622	0.350573	0.0127103	0.415901
DG (34:2)	3.14917e+06	2.4412e+06	2.84072e+06	3.28737e+06	4.03372e+06	4.11322e+06	2.21157e+06	2.40603e+06	2.79928e+06	0.182359	-0.913528	-0.295109	0.396285	1.55157	1.67463	-1.26898	-0.967968	-0.35925	1.35621	0.879706	1.35621	-1.13674	0.0429283	0.277657	0.0867151	0.334711
DG (36:3)	1.80159e+06	1.30927e+06	1.55982e+06	1.77666e+06	1.75306e+06	1.67764e+06	1.41038e+06	1.43336e+06	1.48975e+06	1.31085	-1.58924	-0.113345	1.16396	1.02496	0.580719	-0.993605	-0.858238	-0.526065	1.1149	0.927809	1.1149	-1.07781	0.334487	0.513274	0.407947	0.548029
DG (34:1)	1.2714e+07	9.49471e+06	9.95891e+06	1.53963e+07	1.6707e+07	1.65795e+07	1.32553e+07	1.18452e+07	1.31725e+07	-0.211432	-1.51559	-1.32754	0.875165	1.40614	1.35449	0.00784588	-0.563393	-0.0256816	1.51341	1.1898	1.51341	1.1898	0.0196236	0.169177	0.0487873	0.21431
DG (36:2)	1.13707e+07	9.0083e+06	9.73557e+06	1.23824e+07	1.2186e+07	1.27566e+07	1.10691e+07	1.00343e+07	1.09927e+07	0.258816	-1.70594	-1.10109	1.1002	0.936851	1.4114	0.00799166	-0.852679	-0.0555545	1.23943	1.0658	1.23943	1.0658	0.0678955	0.458792	0.12191	0.511793
DG (38:3)	354056	228851	274977	875895	942442	913896	200321	169637	235876	-0.352293	-0.745558	-0.600676	1.28679	1.49581	1.40614	-0.83517	-0.931546	-0.723492	3.18485	0.706195	3.18485	-1.41604	0.000592792	0.133967	0.00478976	0.18542
DG (34:0)	150148	114412	108528	445715	493744	463290	125108	270942	294471	-0.822118	-1.05925	-1.0983	1.1392	1.4579	1.25582	-0.988277	-0.0205556	0.135577	3.75983	1.85083	3.75983	1.85083	5.91e-05	0.178094	0.00119561	0.221845
Propionylcarnitine (C3:0)	29622209	21342804	23817555	44468920	44170898	46040473	35495630	34171112	38631857	-0.669206	-1.64388	-1.35254	1.07858	1.0435	1.26359	0.0222261	-0.133699	0.39143	1.80096	1.44818	1.80096	1.44818	0.0113807	0.026657	0.0103098	0.0437508
Isobutyrylcarnitine (C4:0)	1159482	1221168	1233864	1268587	1566031	1665821	2895804	2580159	2966124	-0.953903	-0.867394	-0.849589	-0.800893	-0.383755	-0.243809	1.48113	1.03847	1.57975	1.2451	2.33561	1.2451	2.33561	0.127023	0.0041978	0.0789494	0.0137793
Butyrylcarnitine (C4:0)	12020240	7977363	9753800	14302682	16491643	17405984	12569759	12171801	14444401	-0.349433	-1.76917	-1.14534	0.45209	1.22078	1.54187	-0.156459	-0.29621	0.501857	1.6201	1.31711	1.6201	1.31711	0.0161724	0.0971071	0.0130673	0.127502
3-Hydroxybutyrylcarnitine (C4:0 OH)	482159	447510	455787	530625	632063	633258	267108	288923	322990	0.240276	-0.0282752	0.0358768	0.615919	1.40213	1.41139	-1.4265	-1.25742	-0.993384	1.29628	0.634464	1.29628	-1.57613	0.0464632	0.00188823	0.0341293	0.0106125
Valerylcarnitine (C5:0)	1213438	1149890	1215255	3178394	3269764	3474227	4112569	3671465	4123834	-1.34984	-1.40312	-1.34831	0.297837	0.374454	0.545902	1.08117	0.711292	1.09062	2.77271	3.32754	2.77271	3.32754	0.000998488	0.00242479	0.00306957	0.0106125
Tiglylcarnitine (C5:1)	204604	170719	186805	318325	334164	346957	103230	100396	110312	-0.0398254	-0.396245	-0.227044	1.15635	1.32295	1.45752	-1.10613	-1.13594	-1.03164	1.77797	0.558482	1.77797	-1.79057	0.000395208	0.00897919	0.00306957	0.0168424
Hexanoylcarnitine (C6:0)	99550	118310	116236	220214	251023	285376	119826	106214	125940	-0.904431	-0.625131	-0.656009	0.892021	1.35071	1.86216	-0.602561	-0.805217	-0.511536	2.26466	1.05354	2.26466	1.05354	0.0114837	0.513327	0.0103098	0.561665
Octanoylcarnitine (C8:0)	28835	33873	31351	63330	70933	79207	42857	37349	47701	-1.12489	-0.834957	-0.980094	0.860247	1.29779	1.77394	-0.317942	-0.634919	-0.0391777	2.26953	1.35986	2.26953	1.35986	0.00809545	0.0450118	0.00934447	0.0656673
Tetradecanoylcarnitine (C14:0)	723851	717444	526385	2921984	2240913	2468011	2343710	2533530	2816042	-1.30437	-1.31135	-1.51947	1.09	0.348127	0.595499	0.460101	0.666868	0.974602	3.87812	3.90982	3.87812	3.90982	0.0065521	0.00139061	0.00882349	0.0106125
Palmitoylcarnitine (C16:0)	237010	99751	156384	603142	771029	812840	165566	139221	165429	-0.410923	-0.909926	-0.704037	0.920143	1.53049	1.6825	-0.670656	-0.766433	-0.671154	4.43483	0.953505	4.43483	-1.04876	0.00336339	0.867248	0.00612682	0.87592
9,12-Hexadecadienoylcarnitine (C16:0 OH)	133740	85744	90230	292513	225217	267256	156672	113112	133811	-0.45347	-1.1183	-1.05616	1.74583	0.813653	1.39597	-0.13582	-0.739206	-0.452487	2.53456	1.30313	2.53456	1.30313	0.00379136	0.192002	0.00612682	0.229181
9-Hexadecenoylcarnitine (C16:1)	80096	42154	35547	80759	134486	137796	142663	156312	166280	-0.607294	-1.41981	-1.5613	-0.593097	0.557451	0.628333	0.732558	1.02485	1.23831	2.23732	2.94845	2.23732	2.94845	0.0523785	0.00763681	0.0352682	0.0167119
Oleoylcarnitine (C18:1)	1251980	915403	888983	4798604	5403548	5715741	1883358	1651760	2060707	-0.789593	-0.9694	-0.983514	1.10509	1.42826	1.59504	-0.452298	-0.576023	-0.357555	5.20811	1.83087	5.20811	1.83087	0.00113969	0.00704106	0.00306957	0.0167119

## Sheet: (B) Hydrophilic metabolites
Used to generate the heatmap on S1 Fig
	Absolute values									z-score normalized values									Ratio of metabolite level changes		Metabolite fold change compared to WT		Metabolite level change statistical significance		Metabolite level change statistical significance (adjusted for multiple comparisons)
Polar_metabolite	WT_1	WT_2	WT_3	TMEM41BKO_1	TMEM41BKO_2	TMEM41BKO_3	VMP1KO_1	VMP1KO_2	VMP1KO_3	WT_1	WT_2	WT_3	TMEM41BKO_1	TMEM41BKO_2	TMEM41BKO_3	VMP1KO_1	VMP1KO_2	VMP1KO_3	Ratio_TMEM41BKO_vs_WT	Ratio_VMP1KO_vs_WT	FC_TMEM41BKO_vs_WT	FC_VMP1KO_vs_WT	p_val_TMEM41B_vs_WT	p_val_VMP1_vs_WT	adj_p_val_TMEM41B_vs_WT	adj_p_val_VMP1_vs_WT
Aconitic_Acid	13900.5	22929.9	18040.1	31756.6	30782.4	30491.7	32466.3	33081.1	35823.7	-1.93418	-0.668315	-1.35382	0.569149	0.432571	0.391806	0.66864	0.754824	1.13933	1.69546	1.84746	1.69546	1.84746	0.0371612	0.0166963	0.0351173	0.0306907
A_Ketoglutaric_Acid	42556.5	38603.1	32879.2	97206.5	101679	96348.4	56576.9	50456.9	51022.2	-0.790511	-0.943109	-1.16405	1.31893	1.49155	1.28581	-0.249334	-0.485563	-0.46374	2.58888	1.38598	2.58888	1.38598	0.000214135	0.0162982	0.00202362	0.0306907
Citric_Acid	110108	191870	166763	385627	336485	340099	350261	329460	378855	-1.83818	-0.992019	-1.25185	1.0132	0.504616	0.542025	0.647191	0.431912	0.943113	2.26609	2.25834	2.26609	2.25834	0.00403115	0.00460003	0.00761887	0.0209071
Isocitric_Acid	27422.2	48252.2	41938.3	88944.9	80122.5	80333.3	82977.2	80100.9	89751.6	-1.89837	-0.944362	-1.23354	0.919362	0.515298	0.52495	0.646042	0.514309	0.95631	2.12053	2.14968	2.12053	2.14968	0.00887116	0.00842612	0.0119761	0.02276
Malic_Acid	134026	314404	233115	264670	366378	362652	204153	262119	254862	-1.88647	0.686751	-0.472896	-0.0227455	1.42818	1.37503	-0.886058	-0.0591336	-0.162666	1.45801	1.05809	1.45801	1.05809	0.180459	0.829551	0.106584	0.837846
Succinate	70985.5	72295.1	66047.2	134329	147238	149193	56350.1	48563.5	56062.2	-0.457159	-0.423937	-0.582431	1.1497	1.47715	1.52676	-0.828419	-1.02594	-0.835722	2.05783	0.769013	2.05783	-1.30037	0.00131018	0.00876348	0.00358651	0.02276
Fumarate	7452.51	17700.8	12659.7	12933.4	18176	17704.3	13997.4	19090.7	15302.6	-2.16695	0.774666	-0.672313	-0.593746	0.911083	0.77567	-0.288333	1.17361	0.0863091	1.29093	1.27974	1.29093	1.27974	0.356069	0.367437	0.186936	0.392941
F16BP	176549	242016	191271	366938	482080	455232	636089	662859	1.87706e+06	-0.788769	-0.656028	-0.75892	-0.402738	-0.169276	-0.223713	0.142991	0.19727	2.65918	2.13869	5.20797	2.13869	5.20797	0.00877925	0.171492	0.0119761	0.194858
3PG	52790.2	44344.8	53061.3	62470.7	54500.2	54767.1	75222.8	73026.4	104106	-0.645244	-1.13975	-0.629368	-0.0784169	-0.545116	-0.529492	0.668269	0.539661	2.35946	1.14342	1.68017	1.14342	1.68017	0.13811	0.067018	0.0870092	0.0870276
G3P	60519.8	59140.6	54607.5	76447.8	143910	136842	300775	359428	769802	-0.711816	-0.718052	-0.73855	-0.639794	-0.334749	-0.36671	0.37455	0.639763	2.49536	2.04972	8.20578	2.04972	8.20578	0.103307	0.10501	0.0697325	0.127272
F6P	17887.3	21951.1	17369	30567.9	58402	58506.8	59111.8	47409.7	56545.3	-1.30618	-1.07513	-1.33565	-0.585228	0.997281	1.00324	1.03764	0.372313	0.891719	2.57793	2.85045	2.57793	2.85045	0.0802859	0.00440856	0.0656229	0.0209071
G6P	77847.1	122940	65867.1	79053.6	145727	140796	164521	169667	202068	-1.1689	-0.154974	-1.43827	-1.14177	0.357414	0.246537	0.779998	0.895715	1.62425	1.37098	2.01106	1.37098	2.01106	0.300883	0.0168816	0.167255	0.0306907
PEP	5345.27	4294.6	4523.59	9829.58	22653.3	21946.1	33095.4	22110.9	22838.7	-1.10997	-1.21649	-1.19328	-0.655316	0.644851	0.57315	1.70355	0.58986	0.663649	3.84292	5.51032	3.84292	5.51032	0.0833307	0.0258408	0.0656229	0.0427078
6PG	31161.2	28763.7	24254.5	35781.7	42795.3	41525.7	46749.8	51757.3	54517.3	-0.866572	-1.10987	-1.56745	-0.397692	0.314029	0.185197	0.715324	1.22348	1.50356	1.42675	1.81784	1.42675	1.81784	0.0156384	0.00174806	0.0184729	0.0209071
R5P_5RP_X5P	2.04132e+06	1.69638e+06	1.84184e+06	1.22857e+06	1.41381e+06	1.36353e+06	796346	792954	781207	1.59627	0.823897	1.1496	-0.223621	0.191162	0.0785637	-1.19146	-1.19905	-1.22536	0.717964	0.424857	-1.39283	-2.35373	0.017827	0.00851648	0.0187184	0.02276
Pyruvate	678.523	246.866	266.221	3200.53	2598.48	2897.69	2770.61	2629.61	3505.82	-1.14602	-1.49693	-1.48119	0.904195	0.414772	0.658006	0.554705	0.440081	1.15238	7.29827	7.47396	7.29827	7.47396	0.000456271	0.00352431	0.00215588	0.0209071
Glucose	187422	143817	147828	314894	322660	290795	91469.6	93241.3	96861.7	-0.0026652	-0.480429	-0.436486	1.39399	1.47908	1.12994	-1.05397	-1.03456	-0.994896	1.93783	0.587753	1.93783	-1.7014	0.0015181	0.0403443	0.00358651	0.0611216
Lactic Acid	4.34079e+06	3.11549e+06	3.70181e+06	4.09304e+06	5.09702e+06	5.20376e+06	2.38274e+06	2.24433e+06	2.612e+06	0.65734	-0.497669	0.0550227	0.423806	1.37019	1.4708	-1.18838	-1.31884	-0.97227	1.28999	0.648773	1.28999	-1.54137	0.0973681	0.0558436	0.0697325	0.0780951
